# Supplementary material for: The Association Between Maternal Sleep and Circadian Rhythms During Pregnancy and Infant Sleep and Socioemotional Outcomes
Source: Research Square preprint supplement (doi:10.21203/rs.3.rs-3937599/v1), 2024-02-09
Supplement: Supplementary file 1 [file df2041804982ea560e101f48.docx]

Supplemental Appendix A

**Supplemental Table S1**

*Linear regressions between infant sleep and average prenatal maternal sleep and circadian metrics measured at each trimester controlling for infant sex, age at the Year 1 assessment, and gestational age at birth. Gray boxes indicate associations that held when controlling for family income-to-needs ratio.*

| Dependent Variable | Predictor | *β* | *T* | *p* |
| --- | --- | --- | --- | --- |
| Infant Sleep Disturbances | Maternal Sleep Duration T1 | -0.08 | -0.72 | .47 |
| **Maternal Sleep Duration T2** | **0.19** | **2.09** | **.04** |
| Maternal Sleep Duration T3 | -0.03 | -0.31 | .76 |
| Infant Sleep Disturbances | **Maternal Sleep Midpoint T1** | **0.30** | **2.73** | **.01** |
| Maternal Sleep Midpoint T2 | 0.13 | 1.47 | .14 |
| Maternal Sleep Midpoint T3 | 0.12 | 1.36 | .17 |
| Infant Sleep Disturbances | Maternal CPD T1 | 0.03 | 0.32 | .75 |
| Maternal CPD T2 | 0.15 | 1.79 | .08 |
| **Maternal CPD T3** | **0.22** | **2.71** | **.01** |
| Infant Sleep Disturbances | Maternal IV T1 | -0.07 | -0.71 | .48 |
| Maternal IV T2 | -0.04 | -0.45 | .65 |
| Maternal IV T3 | 0.14 | 1.74 | .08 |
| Infant Sleep Disturbances | Maternal IS T1 | -0.06 | -0.69 | .49 |
| Maternal IS T2 | -0.14 | -1.63 | .10 |
| Maternal IS T3 | -0.07 | -0.83 | .41 |
| Infant Sleep Disturbances | **Maternal Sleep Problems T1** | **0.18** | **2.44** | **.02** |
| **Maternal Sleep Problems T2** | **0.25** | **3.23** | **<.001** |
| **Maternal Sleep Problems T3** | **0.20** | **2.60** | **.01** |

*Note:* T=trimester;CPD=Composite Phase Deviation; IV= Intradaily Variability; IS= Interdaily Stability

**Supplemental Table S2**

*Linear regressions between infant sleep and average prenatal maternal sleep and circadian metrics measured at each trimester controlling for infant sex, age at the Year 1 assessment, and gestational age at birth. Gray boxes indicate associations that held when controlling for family income-to-needs ratio.*

| Dependent Variable | Predictor | *β* | *T* | *p* |
| --- | --- | --- | --- | --- |
| Infant Externalizing Problems | Maternal Sleep Duration T1 | -0.01 | -0.07 | .94 |
| Maternal Sleep Duration T2 | 0.04 | 0.44 | .66 |
| Maternal Sleep Duration T3 | 0.03 | 0.33 | .74 |
| **Maternal Sleep Midpoint T1** | **0.39** | **3.70** | **<.001** |
| **Maternal Sleep Midpoint T2** | **0.25** | **2.79** | **.01** |
| Maternal Sleep Midpoint T3 | 0.16 | 1.88 | .06 |
| **Maternal CPD T1** | **0.34** | **3.86** | **<.001** |
| **Maternal CPD T2** | **0.25** | **3.02** | **<.001** |
| Maternal CPD T3 | 0.07 | 0.84 | .40 |
| Maternal IV T1 | 0.13 | 1.46 | .15 |
| **Maternal IV T2** | **0.24** | **2.85** | **.01** |
| **Maternal IV T3** | **0.21** | **2.57** | **.01** |
| **Maternal IS T1** | **-0.27** | **-3.05** | **<.001** |
| Maternal IS T2 | -0.16 | -1.82 | .10 |
| Maternal IS T3 | -0.02 | -0.22 | .83 |
| Maternal Sleep Problems T1 | 0.02 | 0.31 | .76 |
| **Maternal Sleep Problems T2** | **0.18** | **2.29** | **.02** |
| **Maternal Sleep Problems T3** | **0.16** | **2.06** | **.04** |
| Infant Internalizing Problems | Maternal Sleep Duration T1 | 0.04 | 0.39 | .70 |
| Maternal Sleep Duration T2 | 0.16 | 1.74 | .08 |
| **Maternal Sleep Duration T3** | **0.18** | **2.06** | **.04** |
| **Maternal Sleep Midpoint T1** | **0.34** | **3.20** | **<.001** |
| Maternal Sleep Midpoint T2 | 0.06 | 0.68 | .50 |
| Maternal Sleep Midpoint T3 | 0.06 | 0.68 | .50 |
| Maternal CPD T1 | 0.17 | 1.87 | .06 |
| Maternal CPD T2 | 0.13 | 1.47 | .15 |
| Maternal CPD T3 | 0.01 | 0.16 | .88 |
| Maternal IV T1 | 0.14 | 1.51 | .13 |
| Maternal IV T2 | 0.16 | 1.83 | .07 |
| Maternal IV T3 | 0.15 | 1.82 | .07 |
| Maternal IS T1 | -0.15 | -1.61 | .11 |
| Maternal IS T2 | -0.10 | -1.13 | .26 |
| Maternal IS T3 | -0.09 | -0.99 | .32 |
| Maternal Sleep Problems T1 | 0.04 | 0.57 | .57 |
| **Maternal Sleep Problems T2** | **0.17** | **2.18** | **.03** |
| **Maternal Sleep Problems T3** | **0.18** | **2.36** | **.02** |
| Dysregulation | Maternal Sleep Duration T1 | -0.05 | -0.41 | 0.69 |
| Maternal Sleep Duration T2 | 0.14 | 1.53 | 0.13 |
| Maternal Sleep Duration T3 | 0.12 | 1.44 | 0.15 |
| Maternal Sleep Midpoint T1 | 0.47 | 4.55 | **<0.01** |
| Maternal Sleep Midpoint T2 | 0.09 | 1.04 | 0.30 |
| Maternal Sleep Midpoint T3 | 0.14 | 1.62 | 0.11 |
| **Maternal CPD T1** | **0.21** | **2.33** | **0.02** |
| Maternal CPD T2 | 0.12 | 1.43 | 0.16 |
| Maternal CPD T3 | 0.09 | 1.06 | 0.29 |
| Maternal IV T1 | 0.03 | 0.31 | 0.76 |
| Maternal IV T2 | 0.11 | 1.32 | 0.19 |
| Maternal IV T3 | 0.13 | 1.60 | 0.11 |
| Maternal IS T1 | -0.13 | -1.44 | 0.15 |
| Maternal IS T2 | -0.06 | -0.73 | 0.46 |
| Maternal IS T3 | -0.04 | -0.42 | 0.68 |
| Maternal Sleep Problems T1 | 0.10 | 1.37 | 0.17 |
| **Maternal Sleep Problems T2** | **0.18** | **2.34** | **0.02** |
| **Maternal Sleep Problems T3** | **0.18** | **2.39** | **0.02** |

*Note:* T=trimester;CPD=Composite Phase Deviation; IV= Intradaily Variability; IS= Interdaily Stability

**Supplemental Table S3**

*Linear regressions between infant sleep and average prenatal maternal sleep and circadian metrics controlling for infant sex, age at the time of the Year 1 assessment, gestational age at birth, and family income-to-needs ratio. Only associations that were significant when controlling for the initial set of covariates were re-examined while controlling for family income-to-needs ratio*

| Dependent Variable | Predictor | *β* | *t* | *p* |
| --- | --- | --- | --- | --- |
| Infant Sleep Disturbances | Maternal Sleep Midpoint | 0.11 | 1.40 | .16 |
| Infant Sleep Disturbances | Maternal CPD | 0.11 | 1.31 | .19 |
| **Infant Sleep Disturbances** | **Maternal Sleep Problems** | **0.20** | **2.50** | **.01** |

*Note:* CPD=Composite Phase Deviation

**Supplemental Table S4**

*Linear regressions between infant socioemotional development and average prenatal maternal sleep and circadian metrics controlling for infant sex, age at the time of the Year 1 assessment, and gestational age at birth, and family income-to-needs ratio. Only associations that were significant when controlling for the initial set of covariates were re-examined while controlling for family income-to-needs ratio*

| Outcome | Predictor | *β* | *t* | *p* |
| --- | --- | --- | --- | --- |
| Externalizing Problems | **Maternal Sleep Midpoint** | **0.17** | **2.14** | **0.03** |
| Maternal CPD | 0.17 | 2.00 | **0.05** |
| **Maternal IV** | **0.20** | **2.83** | **0.01** |
| Dysregulation (modified) | **Maternal Sleep Midpoint** | **0.19** | **2.34** | **0.02** |
| Maternal Sleep Problems | 0.16 | 1.88 | 0.06 |

*Note:* Externalizing problems are t-scored, and thus account for child age and sex. The modified dysregulation outcome is a raw score, and so these regression models additionally controlled for child age and sex. CPD=Composite Phase Deviation; IV= Intradaily Variability
